# Supplementary material for: Characterizing College Science Assessments: The Three-Dimensional Learning Assessment Protocol
Source: PLoS One. 2016 Sep 8;11(9):e0162333. doi: 10.1371/journal.pone.0162333 (PMC5015839; doi:10.1371/journal.pone.0162333)
Supplement: S1 Dataset — (XLSX) [file pone.0162333.s001.xlsx]

## Sheet: General
Characterizing College Science Assessments: The Three-Dimensional Learning Assessment Protocol
James T. Laverty, Sonia M. Underwood, Rebecca L. Matz, Lynmarie A. Posey, Justin H. Carmel, Marcos D. Caballero, Cori L. Fata-Hartley, Diane Ebert-May, Sarah E. Jardeleza, Melanie M. Cooper
Supporting Information: Raw Data

## Sheet: Biology
Exam_#	Question_#	CR_or_SR	Point values	SP_Rater1	SP_Rater2	SP_Rater3	CC_Rater1	CC_Rater2	CC_Rater3	CI_Rater1	CI_Rater2	CI_Rater3
Exam1	1-1	SR	1	0	0	0	0	0	0	0	0	0
Exam1	1-2	SR	1	0	0	0	0	0	0	0	0	0
Exam1	1-3	SR	1	0	0	0	0	0	0	1	1	1
Exam1	1-4	SR	1	0	0	0	0	0	0	0	0	0
Exam1	1-5	SR	1	0	0	0	0	0	0	0	0	0
Exam1	1-6	SR	1	0	0	0	0	0	0	1	0	1
Exam1	1-7	SR	1	0	0	0	0	0	0	0	0	0
Exam1	1-8	SR	1	0	0	0	0	0	0	0	0	0
Exam1	1-9	SR	1	0	0	0	0	0	0	0	0	0
Exam1	1-10	SR	1	0	0	0	0	0	0	0	0	0
Exam1	1-11	SR	1	0	0	0	0	0	0	0	0	0
Exam1	1-12	SR	1	0	0	0	0	0	0	0	0	0
Exam1	1-13	SR	1	0	0	1	0	0	0	1	1	1
Exam1	1-14	SR	1	0	0	0	0	0	0	0	0	0
Exam1	1-15	SR	1	0	0	0	0	0	0	0	0	0
Exam1	1-16	SR	1	0	0	0	0	0	0	0	0	1
Exam1	1-17	SR	1	0	0	1	0	0	0	1	1	1
Exam1	1-18	SR	1	0	0	0	0	0	0	0	0	0
Exam1	1-19	SR	1	0	0	0	0	0	0	0	0	0
Exam1	1-20	SR	1	0	0	0	0	0	0	0	0	0
Exam1	1-21	SR	1	0	0	0	0	0	0	0	0	0
Exam1	1-22	SR	1	0	0	0	0	0	0	0	0	0
Exam1	1-23	SR	1	0	0	0	0	0	0	0	0	0
Exam1	1-24	SR	1	0	0	0	0	0	0	0	0	0
Exam1	1-25	SR	1	0	0	0	0	0	0	0	0	0
Exam1	1-26	SR	1	0	0	0	0	0	0	0	0	0
Exam1	1-27	SR	1	0	0	0	0	0	0	0	0	0
Exam1	1-28	SR	1	0	0	0	0	0	0	0	0	0
Exam1	1-29	SR	1	0	0	0	0	0	0	0	0	0
Exam1	1-30	SR	1	0	0	0	0	0	0	0	0	0
Exam1	1-31	SR	1	0	0	0	0	0	0	0	0	0
Exam1	1-32	SR	1	0	0	0	0	0	0	0	0	0
Exam1	1-33	SR	1	0	0	0	0	0	0	0	0	0
Exam1	1-34	SR	1	0	0	0	0	0	0	0	0	0
Exam1	1-35	SR	1	0	0	0	0	0	0	0	0	0
Exam1	1-36	SR	1	0	0	0	0	0	0	0	0	0
Exam1	1-37	SR	1	0	0	0	0	0	0	0	1	0
Exam1	1-38	SR	1	0	0	0	0	0	0	0	0	0
Exam1	1-39	SR	1	0	0	0	0	0	0	0	0	0
Exam1	1-40	SR	1	0	0	0	0	0	0	0	0	0
Exam1	1-41	SR	1	0	0	0	0	0	0	0	0	0
Exam1	1-42	SR	1	0	0	0	0	0	0	0	0	0
Exam1	1-43	SR	1	0	0	0	0	0	0	0	0	0
Exam1	1-44	SR	1	0	0	0	0	0	0	0	0	0
Exam1	1-45	SR	1	0	0	0	0	0	0	0	0	0
Exam1	1-46	SR	1	0	0	0	0	0	0	1	1	1
Exam1	1-47	SR	1	0	0	0	0	0	0	0	0	0
Exam1	1-48	SR	1	0	0	0	0	0	0	1	1	1
Exam1	1-49	SR	1	0	0	0	0	0	0	0	0	0
Exam1	1-50	SR	1	0	0	0	0	0	0	0	0	0
Exam2	2-1	CR	2	1	1	1	1	1	0	1	1	0
Exam2	2-2	CR	2	1	1	1	1	1	0	1	1	1
Exam2	Cluster 2-3, 2-4	CR	6	1	1	1	0	1	0	1	1	1
Exam2	2-5	CR	3	1	1	1	1	1	0	1	1	1
Exam2	2-6	CR	3	1	1	1	1	1	0	1	1	1
Exam2	2-7	CR	7	1	1	1	1	1	0	1	1	1
Exam2	2-8	CR	6	0	0	0	0	0	0	1	1	1
Exam2	2-9	CR	6	1	1	1	1	1	1	1	1	1
Exam2	2-10	CR	4	0	0	1	0	0	0	0	0	1
Exam2	2-11	CR	2	0	0	1	0	0	0	0	0	0
Exam2	2-12	CR	2	0	0	1	0	0	0	0	0	0
Exam2	2-13	CR	10	1	1	1	1	1	1	1	1	1
Exam2	2-bonus	CR	2	1	1	1	1	1	0	1	1	1

## Sheet: Chemistry
Exam	Question	Points	R1SP	R2SP	R3SP	R4SP	R1CCC	R2CCC	R3CCC	R4CCC	R1CI	R2CI	R3CI	R4CI	Dimensions	What?
A	1	10	0	0	0	0	1	0	0	0	0	0	0	0	0
A	2	10	0	0	0	0	0	0	1	0	0	0	0	0	0
A	3	10	0	0	0	0	0	0	0	0	0	0	0	0	0
A	4	10	0	0	0	0	0	0	0	0	0	0	0	0	0
A	5	10	0	0	0	0	0	0	0	0	0	0	0	0	0
A	6	10	0	0	0	0	0	0	0	0	0	0	0	0	0
A	7	10	0	0	0	0	0	0	0	0	0	0	0	0	0
A	8	10	0	0	0	0	0	0	0	0	0	0	0	0	0
A	9	10	1	1	1	1	1	0	1	1	1	0	1	0	2	SP CC
A	10	10	0	0	0	0	0	0	0	0	0	0	0	0	0
A	11	10	0	0	0	0	1	0	1	1	1	0	1	1	2	CC CI
A	12	10	0	0	0	0	0	1	0	0	0	1	1	0	1	CI
A	13	10	0	0	0	0	0	1	0	0	1	1	1	0	1	CI
A	14	10	1	1	0	0	0	0	0	0	0	0	0	0	0
A	15	10	0	0	0	0	0	0	0	0	0	0	0	0	0
A	16	10	0	0	0	0	0	0	0	0	0	0	0	0	0
A	17	10	0	0	0	0	0	0	0	0	0	0	1	0	0
A	18	10	0	0	0	0	0	0	0	0	1	0	1	0	0
A	19	10	0	0	0	0	0	0	0	0	0	0	0	0	0
A	20	10	0	0	0	0	0	0	0	0	0	0	0	0	0
A	21	10	0	0	0	0	0	0	0	0	0	0	0	0	0
A	22	10	0	0	0	0	0	0	0	0	1	0	1	0	0
B	1	3	0	0	0	1	0	0	0	0	0	0	1	1	1	CI
B	2	3	0	0	0	0	1	0	1	1	1	0	1	1	2	CC CI
B	3	3	0	1	1	0	1	1	1	1	0	1	1	1	3	SP CC CI
B	4	3	1	1	1	1	1	0	1	0	1	1	1	0	2	SP CI
B	5	3	0	0	0	0	0	0	0	0	0	0	0	0	0
B	6	3	0	0	0	0	0	0	0	0	0	0	0	0	0
B	7	3	0	0	0	0	0	1	0	1	1	1	1	1	2	CC CI
B	8	3	1	1	1	0	1	1	1	1	1	1	1	1	3	SP CC CI
B	9	3	1	0	1	0	1	1	1	0	1	1	1	1	2	CC CI
B	10	3	0	0	0	0	0	0	0	0	1	0	1	0	0
B	11	3	1	1	1	0	1	0	1	1	1	0	1	1	3	SP CC CI
B	12	3	1	0	0	0	1	0	1	1	1	1	1	1	2	CC CI
B	13	3	1	1	0	0	0	1	1	1	1	1	0	0	1	CC
B	14	3	1	1	1	0	1	0	1	0	1	0	1	1	2	SP CI
B	15	3	0	0	0	0	1	0	0	0	0	0	0	0	0
B	16	3	0	0	0	0	0	0	0	0	1	0	0	1	0
B	17	3	1	1	1	0	1	1	1	1	1	1	1	1	3	SP CC CI
B	18	3	0	0	0	0	0	1	1	1	1	1	1	1	2	CC CI
B	19	3	0	0	1	0	1	1	1	0	1	0	1	0	1	CC
B	20	3	0	0	1	0	1	1	1	1	1	1	1	1	2	CC CI
B	SA1	15	1	1	1	1	1	1	1	1	1	1	1	1	3	SP CC CI
B	SA2	25	1	1	1	1	1	1	1	1	1	1	1	1	3	SP CC CI
B	SA3	10	1	1	1	1	1	1	1	0	0	1	0	0	2	SP CC

## Sheet: Physics
				Rater 1			Rater 2
Rater	Question #	What type of question are you coding?	Points	SP	CC	CI	SP	CC	CI
A	30305	1	12	0	0	1	0	0	1
A	30308	1	6	0	0	1	0	0	0
A	30309	1	3	0	0	1	0	0	0
A	30312	1	5	0	0	1	0	0	1
A	30313	1	3	1	0	1	1	0	1
A	30314	1	3	0	0	1	0	0	1
A	30315	1	3	0	0	1	0	0	0
A	30318	1	6	0	0	1	0	0	1
A	30319	1	3	0	0	1	0	0	1
A	30320	1	3	0	0	1	0	0	1
A	30321	1	3	0	0	1	0	0	1
A	30322	1	2	0	0	1	0	0	1
A	30323	1	3	0	0	1	0	0	0
A	30327	1	9	0	0	1	0	1	1
A	30328	1	3	0	0	1	0	0	1
A	30329	1	3	0	0	1	0	0	1
A	30330	1	3	0	0	1	0	0	1
A	30331	1	3	0	0	1	0	0	1
A	30332	1	3	0	0	0	0	0	0
A	30333	1	3	0	0	1	0	0	1
A	30334	1	3	0	0	0	0	0	0
A	30337	1	6	0	0	1	0	0	1
A	30338	1	3	0	0	1	0	0	1
A	30341	1	6	0	0	0	0	0	0
A	40001	2	25	1	1	1	1	1	1
A	40002	2	25	1	0	1	0	1	1
A	40003	2	25	0	0	1	1	1	1
A	40004	2	10	1	1	1	1	1	1
A	40005	2	10	1	1	1	1	1	1
A	40006	2	5	1	1	1	1	1	1
A	40007	2	25	0	0	1	0	1	1
